# Supplementary material for: NOD2 Genotypes Affect the Symptoms and Mortality in the Porcine Circovirus 2-Spreading Pig Population
Source: MDPI journal article supplement (doi:10.3390/genes12091424), 2021-09-16
Supplement: s1 [file s1]

**Table S1** Mortality of rearing pigs with *NOD2*-2197 genotyping data in the Duroc population.

| Birth year | Male  |      |                  | Female |      |                  | Total |      |                  |
|------------|-------|------|------------------|--------|------|------------------|-------|------|------------------|
|            | Total | Dead | Dead / total (%) | Total  | Dead | Dead / total (%) | Total | Dead | Dead / total (%) |
| 2008       | 40    | 4    | 10.0             | 120    | 5    | 4.2              | 160   | 9    | 5.6              |
| 2009       | 50    | 10   | 20.0             | 129    | 23   | 17.8             | 179   | 33   | 18.4             |
| 2010       | 50    | 21   | 42.0             | 97     | 31   | 32.0             | 147   | 52   | 35.4             |
| 2011       | 18    | 8    | 44.4             | 78     | 7    | 8.9              | 96    | 15   | 15.6             |
| 2012       | 18    | 5    | 27.8             | 96     | 6    | 6.3              | 114   | 11   | 9.6              |
|            | (14)  | (3)  | (21.4)           | (76)   | (5)  | (6.6)            | (90)  | (8)  | (8.9)            |
| 2013       | 10    | 1    | 10.0             | 2      | 0    | 0.0              | 12    | 1    | 8.3              |
|            | (10)  | (1)  | (10.0)           | (2)    | (0)  | (0.0)            | (12)  | (1)  | (8.3)            |

Numbers of animals inoculated with the PCV2 vaccine are indicated in parentheses.

**Table S2** Pigs with growth retardation (“boney pigs”) in the Duroc population.

| Birth<br>year | Male  |       |                      | Female |       |                      | Total |       |                      |
|---------------|-------|-------|----------------------|--------|-------|----------------------|-------|-------|----------------------|
|               | Total | Boney | Boney /<br>total (%) | Total  | Boney | Boney /<br>total (%) | Total | Boney | Boney /<br>total (%) |
| 2008          | 115   | 7     | 6.1                  | 121    | 8     | 6.6                  | 236   | 15    | 6.4                  |
| 2009          | 105   | 14    | 13.3                 | 103    | 12    | 11.7                 | 208   | 26    | 12.5                 |
| 2010          | 76    | 12    | 15.8                 | 67     | 21    | 31.3                 | 143   | 33    | 23.1                 |
| 2011          | 76    | 27    | 35.5                 | 70     | 14    | 20.0                 | 146   | 41    | 28.1                 |
| 2012          | 84    | 4     | 4.8                  | 94     | 5     | 5.3                  | 178   | 9     | 5.1                  |
|               | (66)  | (3)   | (4.5)                | (75)   | (3)   | (4.0)                | (141) | (6)   | (4.3)                |
| 2013          | 134   | 12    | 9.0                  | 144    | 21    | 14.6                 | 278   | 33    | 11.9                 |
|               | (134) | (12)  | (9.0)                | (144)  | (21)  | (14.6)               | (278) | (33)  | (11.9)               |

“Boney” pigs were defined as pigs with less than 75% (16.9 kg) of the average weight of all of pigs at day 60 after birth (22.6 kg). Dead pigs and pigs without weight data were eliminated at day 60 are eliminated. Numbers of animals inoculated with the PCV2 vaccine are indicated in parentheses.

**Table S3** Pigs with growth retardation (“boney pigs”) that have *NOD2*-2197 genotyping data in the Duroc population.

| Birth year | Male  |       |                   | Female |       |                   | Total |       |                   |
|------------|-------|-------|-------------------|--------|-------|-------------------|-------|-------|-------------------|
|            | Total | Boney | Boney / total (%) | Total  | Boney | Boney / total (%) | Total | Boney | Boney / total (%) |
| 2008       | 36    | 3     | 8.3               | 113    | 8     | 7.1               | 149   | 11    | 7.4               |
| 2009       | 38    | 7     | 18.4              | 103    | 12    | 11.7              | 141   | 19    | 13.5              |
| 2010       | 29    | 2     | 6.9               | 66     | 21    | 31.8              | 95    | 23    | 24.2              |
| 2011       | 10    | 1     | 10.0              | 70     | 14    | 20.0              | 80    | 15    | 18.8              |
| 2012       | 13    | 0     | 0.0               | 90     | 5     | 5.6               | 103   | 5     | 4.9               |
|            | (11)  | (0)   | (0.0)             | (71)   | (3)   | (4.2)             | (82)  | (3)   | (3.7)             |
| 2013       | 9     | 2     | 22.2              | 2      | 0     | 0.0               | 11    | 2     | 18.2              |
|            | (9)   | (2)   | (22.2)            | (2)    | (0)   | (0.0)             | (11)  | (2)   | (18.2)            |

“Boney” pigs are defined as pigs with less than 75% (16.9 kg) of the average weight of all of pigs at day 60 after birth (22.6 kg). Dead pigs and pigs without weight data at day 60 after birth are eliminated. Numbers of animals inoculated with the PCV2 vaccine are indicated in parentheses.

**Table S4** Allele frequency of *NOD2*-2197 in male pigs.

| Birth year | AA               | AC | CC              | Frequency<br>of A allele (%) |
|------------|------------------|----|-----------------|------------------------------|
| 2008       | 6                | 21 | 14              | 40.2                         |
| 2009       | 20 <sup>††</sup> | 25 | 6 <sup>**</sup> | 63.7 <sup>††</sup>           |
| 2010       | 5                | 24 | 21              | 34.0                         |
| 2011       | 2                | 11 | 6               | 39.4                         |
| 2012       | 2                | 6  | 13              | 23.8                         |

The numbers of animals with the respective genotypes are shown and the frequency of *NOD2*-2197A in all chromosomes from each group is also indicated. Significant decreases (\*\*;  $P < 0.01$ ) and increases (††,  $P < 0.01$ ) of alleles in comparison with those in 2008 are highlighted. A significant change in the frequency of the *NOD2*-2197A allele compared with that in 2008 is shown with a double dagger (††;  $P < 0.01$ ).

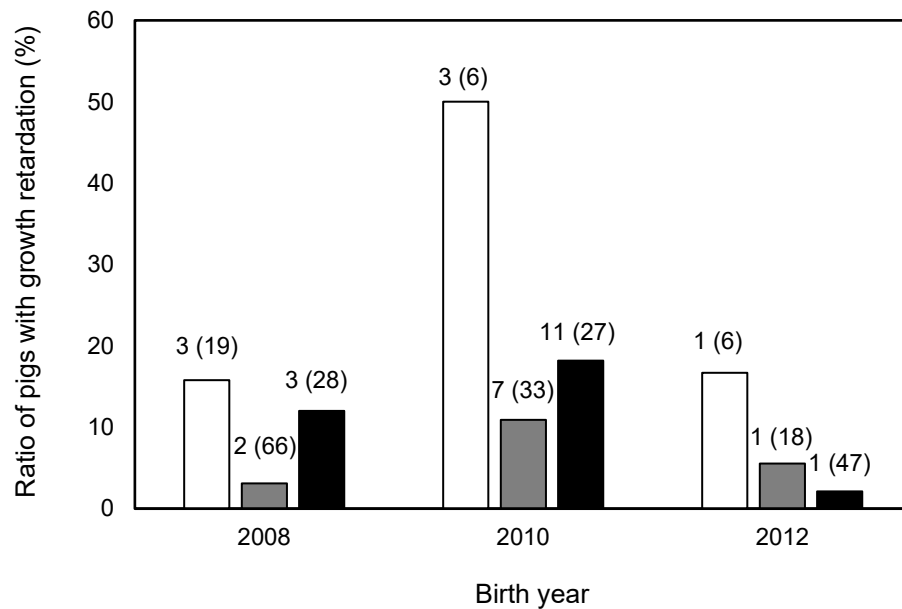

**Figure S1** Effect of *NOD2*-2197 genotypes on ratios of pig with growth retardation. Ratios of pigs with weight less than 75 % of the average throughout this study (2008-2013) at day 60 after birth (22.6 kg) in 2008 (before the PCVAD epidemic), 2010 (under the epidemic) and 2012 (after the epidemic) are indicated for the respective *NOD2*-2197 genotypes (white, *NOD2*-2197AA; gray, *NOD2*-2197AC; black, *NOD2*-2197CC). Numbers of “boney” pigs are indicated with total pig numbers (in parentheses). The pigs in 2012 are limited to those with vaccination.
